# Supplementary material for: A strontium-incorporated nanoporous titanium implant surface for rapid osseointegration
Source: Royal Society of Chemistry journal article supplement (doi:10.1039/c5nr08580b), 2016-01-01
Supplement: c5nr08580b1.pdf [file c5nr08580b1.pdf]

## SUPPORTING INFORMATION

### **Strontium-incorporated Nanoporous Titanium Implant Surface for Rapid Osseointegration**

Wenjie Zhang <sup>a,1</sup>, Huiliang Cao <sup>b,1</sup>, Xiaochen Zhang <sup>a,1</sup>, Guanglong Li <sup>a</sup>, Qing Chang <sup>c</sup>, Jun Zhao <sup>a</sup>,  
Yuqin Qiao <sup>b</sup>, Xun Ding <sup>a</sup>, Guangzheng Yang <sup>a</sup>, Xuanyong Liu <sup>b,\*\*</sup>, and Xinquan Jiang <sup>a,\*</sup>

<sup>a</sup> Department of Prosthodontics, Oral Bioengineering and regenerative medicine Lab, Ninth People's Hospital Affiliated to Shanghai Jiao Tong University, School of Medicine, 639 Zhizaoju Road, Shanghai 200011, China

<sup>b</sup> State Key Laboratory of High Performance Ceramics and Superfine Microstructure, Shanghai Institute of Ceramics, Chinese Academy of Sciences, 1295 Ding-xi Road, Shanghai 200050, China

<sup>c</sup> Shanghai Institute of Digestive Surgery and Department of Surgery, Rui Jin Hospital, Shanghai Jiao Tong University, School of Medicine, 197 Ruijin Road II, Shanghai 200025, China

<sup>1</sup> These authors contributed equally

\* Corresponding author. Department of Prosthodontics, College of Stomatology, Ninth People's Hospital, School of Medicine, Shanghai Jiao Tong University, 639 Zhizaoju Road, Shanghai 200011, PR China.

\*\* Corresponding author. State Key Laboratory of High Performance Ceramics and Superfine Microstructure, Shanghai Institute of Ceramics, Chinese Academy of Sciences, Shanghai 200050, PR China. Tel./fax: +86 21 52412409.

E-mail addresses: xinquanjiang@aliyun.com (X. Jiang), xyliu@mail.sic.ac.cn (X. Liu).

**Table S1:** Primers for RT-PCR assay.

| Gene                                | Prime sequence                     | Product        | Accession      |
|-------------------------------------|------------------------------------|----------------|----------------|
|                                     | (F, forward; R, reverse; 5' to 3') | length<br>(bp) | number         |
| <b>GAPDH</b>                        | F: TTCGACAGTCAGCCGCATCTT           | 79             | XM_848580.1    |
|                                     | R: ATCCGTTGACTCCGACCTTCA           |                |                |
| <b>Integrin <math>\beta</math>1</b> | F: AATGTAACCAACCGTAGC              | 265            | XM_535143.3    |
|                                     | R: TTCGGAAGTCTGAAGTAATC            |                |                |
| <b>VEGF</b>                         | F: CCCGGTATAAACCTGGAGC             | 113            | NM_001003175.2 |
|                                     | R: ACGCGAGTCTGTGTTTTTGC            |                |                |
| <b>PDGF-BB</b>                      | F: CGCTCTTCCTGTCTCTCTGC            | 196            | NM_001003383.1 |
|                                     | R: TCTCCAGAATGGGATCGGGT            |                |                |
| <b>ALP</b>                          | F: CAGACAGGTGCCAGATAGCG            | 258            | XM_534605.4    |
|                                     | R: GCGTCCGAGTACCAGTTGC             |                |                |
| <b>OPN</b>                          | F: CACTGACATTCCAGCAAC              | 188            | XM_535649.2    |
|                                     | R: CTTCCATACTCGCACTTT              |                |                |
| <b>OCN</b>                          | F: GTCCAGCAGATGCAAAGCC             | 120            | XM_547536.2    |
|                                     | R: CCAGCCCAGAGTCCAGGTAG            |                |                |

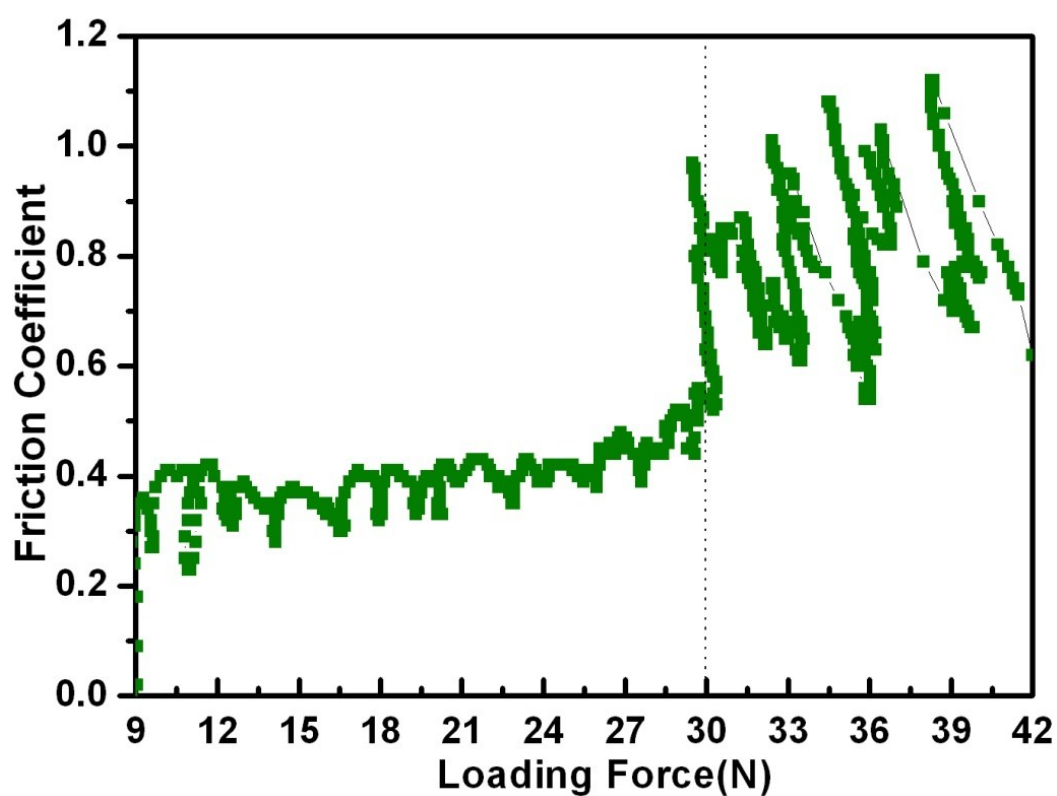

**Fig. S1.** Friction coefficient vs. loading force curve acquired in MAO-Sr group by scratching the fabricated coating with a loading speed of 100N/min. A break point of friction coefficient was identified at about 30N, indicating that the coating was broken at this loading point. Therefore, this force was identified as the adhesion strength of the coating.

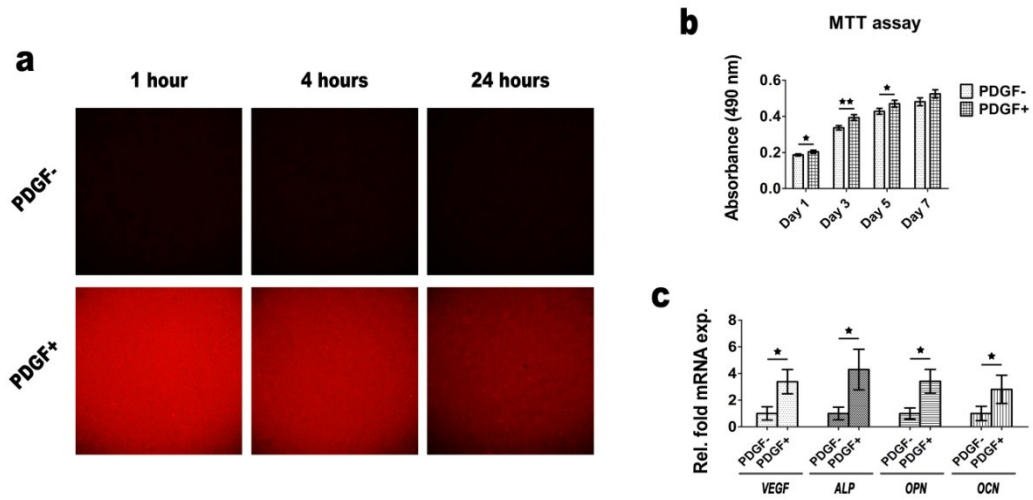

**Fig. S2.** The bioactive effects of rhPDGF-BB loaded MAO coating. (a) Enhanced fibronectin aggregation on the rhPDGF-BB loaded coating was detected by immunofluorescence assay. (b) MTT assay results showed the proliferation activity of canine BMSCs seeding on the coatings with or without rhPDGF-BB. Error bars represent SD (n=3). (c) RT-PCR results displayed the expression of VEGF, ALP, OPN, and OCN in canine BMSCs after 3 days culture on different coatings. Error bars represent SD (n=3). (★, represents  $p < 0.05$ ; ★★, represents  $p < 0.01$ ).

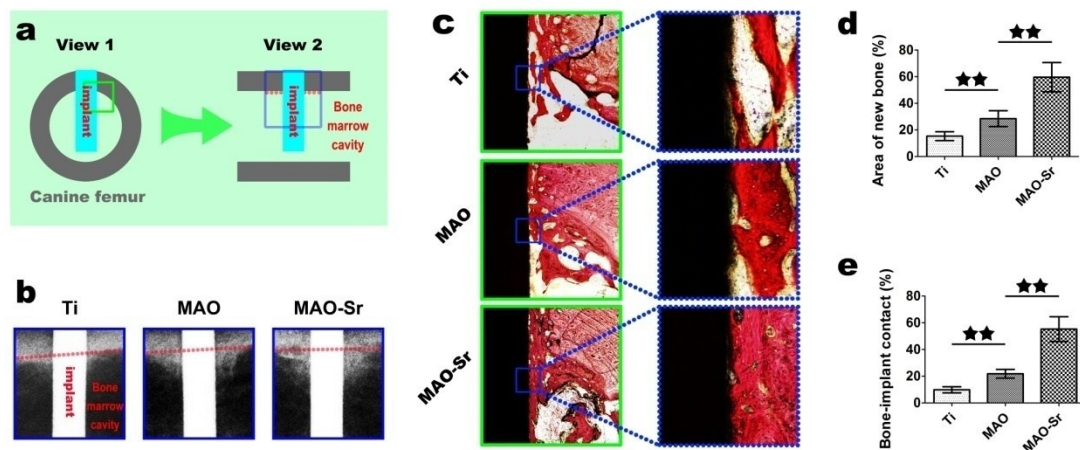

**Fig. S3.** The rapid osseointegration evaluation in the canine femur implantation model. (a) Schematic representation of the selected observation regions (green rectangular area in view 1 and the blue one in view 2). (b) X-ray images showed newly- formed bones protruding into the bone marrow cavity (red dash lines indicated the border of the cavity). (c) Histological sections stained with Van Gieson's picro fuchsin solution. (d-e) The statistical results of the percent of BIC and the area of newly-formed bones around the implants. Error bars represent SD (n=3). (★★, represents  $p < 0.01$ ).
